# Supplementary material for: Unveiling the solution structure of a DNA duplex with continuous silver-modified Watson-Crick base pairs
Source: Springer Nature journal article supplement (doi:10.1038/s41467-024-51876-8), 2024-09-05
Supplement: MOESM3 [file 41467_2024_51876_MOESM3_ESM.xlsx]

## Sheet: Hoja1
DFT-OPTIMIZED COORDINATES FOR DUPLEX I-Ag
ATOM	X	Y	Z
O	-15.6664	-3.91828	10.2844
O	-12.8043	-7.21388	9.80209
C	-15.8084	-5.27655	10.5997
C	-13.4374	-5.9401	9.84464
N	-14.6757	-4.55478	6.71215
O	-15.2969	-6.04896	8.38974
C	-15.5972	-5.96741	3.60198
C	-16.1712	-3.68495	3.60113
C	-14.9474	-6.20047	9.75084
C	-15.5118	-2.62703	5.92014
C	-15.6663	-3.64223	4.93204
N	-15.1269	-6.00459	4.84598
C	-14.919	-3.21187	6.99142
C	-14.2081	-5.55084	7.62159
C	-15.1466	-4.81402	5.45822
N	-15.6552	-7.1478	2.94192
C	-13.1816	-5.06127	8.63392
H	-16.8534	-5.60463	10.5133
H	-15.5295	-5.39538	11.6506
H	-13.1616	-5.4331	10.7729
H	-15.1494	-7.2294	10.0717
H	-14.6038	-2.76401	7.91841
H	-13.7854	-6.35748	7.02089
H	-13.3658	-4.03037	8.93299
H	-12.1641	-5.1083	8.25482
H	-15.8758	-7.14446	1.96284
H	-15.0752	-7.90111	3.26233
H	-15.8088	-1.59398	5.84699
H	-16.0349	-3.77847	9.40563
O	-16.687	-2.70533	3.02342
N	-16.0632	-4.88359	2.95727
O	-11.0069	-7.69796	8.09146
O	-9.58922	-9.72026	4.63931
C	-11.6224	-8.83803	7.50309
C	-9.8487	-8.7362	5.64268
N	-11.6188	-5.87549	4.18638
O	-12.0249	-7.83973	5.3571
C	-12.8473	-5.74429	0.888443
C	-13.1716	-3.63272	1.91479
C	-11.3391	-8.88385	6.01993
C	-12.2323	-3.72891	4.38104
C	-12.5764	-4.19534	3.0759
N	-12.3387	-6.33917	1.95748
C	-11.6496	-4.7743	5.03115
C	-11.1477	-7.18741	4.46508
C	-12.199	-5.52595	3.00601
N	-12.9518	-6.50907	-0.226856
C	-9.7927	-7.30316	5.13968
H	-12.7063	-8.81569	7.6449
H	-11.2383	-9.75415	7.96372
H	-9.18013	-8.90725	6.48949
H	-11.7045	-9.8543	5.66261
H	-11.304	-4.85342	6.04904
H	-11.1175	-7.70111	3.49941
H	-9.73583	-6.64011	6.00445
H	-8.94978	-7.08534	4.48968
H	-13.1542	-6.07603	-1.11674
H	-12.3131	-7.28786	-0.258104
H	-12.4609	-2.76446	4.80775
P	-11.2072	-7.42136	9.67109
O	-13.5607	-2.44848	1.83587
N	-13.2763	-4.46797	0.829506
O	-10.8148	-8.62594	10.499
O	-10.4379	-6.17124	10.0374
O	-8.83864	-9.24528	2.26493
O	-8.66571	-9.68131	-2.01627
N	-10.5761	-2.3272	-0.618218
C	-9.76683	-9.99312	1.4906
C	-8.43	-9.42545	-0.635166
N	-10.1058	-1.64808	1.54518
N	-9.35822	-6.03091	0.298786
O	-10.291	-8.14913	0.017211
C	-10.6396	-3.30711	-1.52896
C	-10.1652	-2.60633	0.636882
C	-9.79288	-9.47361	0.066953
C	-9.2476	-4.62498	2.04156
C	-9.76444	-3.9279	0.912645
N	-10.2823	-4.55625	-1.37212
C	-9.02008	-5.89999	1.63145
C	-9.32489	-7.24549	-0.4669
C	-9.83595	-4.83463	-0.139562
C	-7.99663	-7.99004	-0.401336
H	-10.7725	-9.91444	1.91037
H	-9.48818	-11.0517	1.47059
H	-7.72412	-10.1533	-0.227915
H	-10.9981	-3.01229	-2.50643
H	-10.4706	-10.1306	-0.48953
H	-8.65157	-6.7453	2.18804
H	-9.55673	-6.96127	-1.49485
H	-7.2868	-7.62762	-1.14075
H	-7.54327	-7.9062	0.585436
H	-10.4578	-0.721408	1.35242
H	-9.84041	-1.84383	2.51237
H	-9.09461	-4.23884	3.03573
P	-8.29211	-9.78545	3.68908
O	-7.82304	-11.2191	3.56805
O	-7.19809	-8.83858	4.136
O	-7.04004	-8.41793	-3.54306
C	-7.92532	-7.71245	-4.40241
H	-8.97156	-7.87469	-4.12509
H	-7.80839	-8.05621	-5.43346
C	-7.6707	-6.22969	-4.37444
H	-8.42521	-5.79131	-5.0442
O	-7.83238	-5.70584	-3.06569
C	-7.52461	-4.34586	-3.18864
H	-8.39207	-3.80764	-3.56729
N	-7.23903	-3.77969	-1.87776
C	-6.74573	-4.51665	-0.858994
H	-6.55028	-5.55743	-1.0651
C	-6.50699	-3.97311	0.351918
H	-6.12935	-4.57467	1.16301
C	-6.83532	-2.59622	0.529467
N	-6.69409	-2.02214	1.71899
H	-6.41403	-2.55873	2.51915
H	-6.97144	-1.06606	1.88867
N	-7.27282	-1.87419	-0.492325
C	-7.44841	-2.40816	-1.73174
O	-7.77452	-1.72917	-2.6887
C	-6.29986	-5.68384	-4.77187
H	-5.51391	-6.26853	-4.28586
C	-6.35554	-4.26913	-4.18281
H	-5.42716	-4.00396	-3.68381
H	-6.54545	-3.51205	-4.94296
O	-6.13875	-5.73262	-6.17746
P	-7.46319	-9.91122	-3.07729
O	-8.02987	-10.6968	-4.23644
O	-6.27619	-10.5698	-2.41177
O	-4.71094	-3.75421	-6.96416
C	-5.55572	-3.10654	-7.90161
H	-6.60848	-3.2769	-7.65433
H	-5.38626	-3.49407	-8.911
C	-5.28511	-1.61713	-7.88535
H	-5.93224	-1.16604	-8.64853
O	-5.60597	-1.10226	-6.60706
C	-4.55693	-0.27801	-6.14803
H	-4.70633	0.751669	-6.4659
N	-4.55009	-0.247136	-4.70401
C	-4.27698	-1.37942	-3.99679
H	-4.10802	-2.27292	-4.5831
C	-4.21386	-1.39668	-2.6553
C	-3.81175	-2.60342	-1.87272
H	-2.86109	-2.46367	-1.35375
H	-4.53586	-2.85572	-1.10137
H	-3.70549	-3.47703	-2.51827
C	-4.50464	-0.151759	-1.96523
O	-4.5021	-0.101559	-0.720788
N	-4.76118	0.954789	-2.69161
C	-4.78183	0.961248	-4.03906
O	-4.97983	1.97666	-4.69694
C	-3.81879	-1.21647	-8.18149
H	-3.24871	-2.03401	-8.62898
C	-3.31338	-0.867195	-6.79672
H	-3.01011	-1.79218	-6.30329
H	-2.4614	-0.200471	-6.78132
O	-3.84147	-0.130096	-9.10895
P	-4.70205	-5.36947	-6.83101
O	-4.6132	-6.02709	-8.18757
O	-3.56725	-5.72205	-5.89577
O	-3.09592	2.01218	-7.97194
C	-3.84661	3.20902	-8.06183
H	-4.63212	3.1822	-7.30369
H	-4.32508	3.31016	-9.03965
C	-2.95384	4.42368	-7.83428
H	-3.54138	5.31866	-8.0648
O	-2.50547	4.51902	-6.49802
C	-1.16125	4.12005	-6.34443
H	-0.604465	4.95161	-5.91876
N	-1.073	3.03268	-5.37171
C	-0.954895	1.72049	-5.69451
H	-0.787288	1.46321	-6.72609
C	-1.03092	0.741917	-4.77591
H	-0.903066	-0.294616	-5.04547
C	-1.27622	1.12475	-3.43169
N	-1.47362	0.195094	-2.51216
H	-1.50573	-0.77685	-2.80802
H	-1.72101	0.433165	-1.56247
N	-1.31234	2.41166	-3.1094
C	-1.22046	3.40077	-4.03351
O	-1.2845	4.57879	-3.71767
C	-1.69604	4.35078	-8.69186
H	-1.92098	3.69631	-9.52722
C	-0.640455	3.79189	-7.74052
H	-0.527642	2.72789	-7.91182
H	0.341859	4.23404	-7.87478
O	-1.35342	5.62456	-9.23048
P	-2.74097	1.04152	-9.24133
O	-2.94798	1.7846	-10.5356
O	-1.31866	0.57158	-9.01631
O	1.16424	5.94797	-9.40669
O	4.58504	7.34087	-7.22322
C	1.19512	7.09076	-8.54453
C	3.62242	6.52623	-7.87078
N	2.56137	3.93437	-5.49209
O	1.74641	5.82294	-6.59565
C	2.16967	4.45652	-2.02201
C	1.87109	2.153	-2.49336
C	2.17911	6.88468	-7.41946
C	2.22279	1.75602	-5.08032
C	2.11858	2.48138	-3.85637
N	2.35841	4.83005	-3.28395
C	2.48509	2.66402	-6.05714
C	2.904	5.16685	-6.11122
C	2.33832	3.81712	-4.15069
N	2.22673	5.43222	-1.09456
C	3.78589	5.10735	-7.3485
H	0.207377	7.29242	-8.12107
H	1.49555	7.97498	-9.11253
H	3.74444	6.57936	-8.95717
H	2.20415	7.8196	-6.84729
H	2.63385	2.51357	-7.11314
H	3.38751	5.77948	-5.34178
H	3.37991	4.40352	-8.07766
H	4.82163	4.84569	-7.14426
H	2.21836	5.21148	-0.114561
H	2.63784	6.31444	-1.35899
H	2.11346	0.692789	-5.21457
P	-0.14704	5.68476	-10.3006
O	1.63634	1.00147	-2.07755
N	1.90653	3.1984	-1.61109
O	-0.398834	6.80806	-11.2728
O	0.010158	4.32649	-11.0009
O	6.05533	9.24706	-6.73434
O	8.8518	10.1185	-3.98163
N	5.32641	3.69348	-0.567326
C	5.7511	10.0114	-5.57766
C	8.02421	9.21294	-4.69739
N	4.97178	1.92915	-2.02183
N	6.49782	6.01396	-3.61215
O	5.95395	8.22287	-4.03334
C	5.67293	4.97121	-0.371126
C	5.33564	3.1897	-1.81548
C	6.52059	9.4643	-4.39839
C	5.91417	3.95529	-4.28456
C	5.73137	4.04681	-2.86834
N	6.04121	5.84327	-1.27225
C	6.3767	5.17082	-4.69558
C	6.97302	7.36392	-3.56859
C	6.08285	5.34037	-2.50448
C	8.17031	7.7049	-4.45012
H	4.6803	10.0151	-5.35909
H	6.05615	11.0481	-5.74681
H	8.24277	9.42582	-5.74292
H	5.632	5.32441	0.647018
H	6.43594	10.1821	-3.5726
H	6.61249	5.51588	-5.68861
H	7.20334	7.55977	-2.5204
H	9.12695	7.41719	-4.02053
H	8.0809	7.2061	-5.41713
H	4.74629	1.32243	-1.24611
H	5.06024	1.51202	-2.93533
H	5.69151	3.11287	-4.92014
P	4.9596	8.8015	-7.81636
O	3.75905	9.73042	-7.82972
O	5.61179	8.69655	-9.17568
O	8.49707	9.2665	-1.65328
O	10.5662	9.88867	1.97805
C	7.95784	9.88555	-0.493866
C	10.0708	9.34603	0.755854
N	9.17157	5.89082	0.133587
O	8.19459	7.89313	0.841148
C	8.4657	3.05294	2.10535
C	8.31709	2.46327	-0.184011
C	8.53922	9.25796	0.76373
C	8.98513	4.55349	-1.64992
C	8.71206	3.79381	-0.473364
N	8.74122	4.33217	1.89846
C	9.25615	5.81919	-1.24932
C	9.33682	7.06471	0.931167
C	8.8489	4.65613	0.608077
N	8.4207	2.62919	3.39185
C	10.5125	7.92037	0.480384
H	6.87817	9.73749	-0.510558
H	8.16575	10.9597	-0.483054
H	10.3537	10.0456	-0.02373
H	8.13477	9.79944	1.62775
H	9.51554	6.68404	-1.83446
H	9.47121	6.73279	1.96108
H	10.6814	7.7921	-0.586064
H	11.4229	7.63077	0.998412
H	8.57839	1.64786	3.57741
H	8.8437	3.25757	4.05768
H	9.01215	4.20557	-2.66882
P	9.66621	9.86559	-2.61381
O	8.05092	1.58558	-1.03942
N	8.20381	2.14917	1.13911
O	10.2038	11.1743	-2.09463
O	10.7257	8.7934	-2.77725
O	12.7794	8.91787	2.76746
C	12.1922	8.44284	3.98083
H	11.1269	8.68005	4.01669
H	12.6659	8.93114	4.83809
C	12.3459	6.95214	4.14858
H	11.7206	6.69666	5.01758
O	11.8983	6.23449	3.02244
C	12.2712	4.90768	3.30752
H	11.6433	4.51553	4.1116
N	12.0722	4.05324	2.16275
C	12.2928	4.47513	0.881533
H	12.5933	5.50784	0.768988
C	12.1357	3.6622	-0.178719
C	12.3975	4.08075	-1.58696
H	12.6588	5.13753	-1.64658
H	13.2126	3.50188	-2.02171
H	11.522	3.92665	-2.21364
C	11.6588	2.31134	0.085907
O	11.3928	1.52145	-0.829843
N	11.5455	1.91471	1.3748
C	11.7984	2.71494	2.42285
O	11.8179	2.31925	3.58619
C	13.7573	6.40512	4.44651
H	14.5373	7.03545	4.01073
C	13.7208	5.02981	3.77685
H	14.3913	5.00715	2.91536
H	13.9894	4.21225	4.43963
O	13.9	6.37649	5.85868
P	12.1393	10.2301	2.08696
O	12.3111	11.4604	2.9415
O	12.7631	10.4007	0.693046
O	15.438	4.44477	6.52323
C	14.6097	3.66355	7.36957
H	13.5526	3.90721	7.22151
H	14.8458	3.85474	8.4207
C	14.8146	2.19303	7.08929
H	14.2649	1.64332	7.86343
O	14.2954	1.8704	5.81291
C	15.1552	0.954024	5.19034
H	14.9602	-0.069954	5.5192
N	14.9258	0.974806	3.76257
C	15.2858	2.06536	3.03478
H	15.7243	2.8865	3.58154
C	15.1086	2.12668	1.70728
H	15.4099	2.99327	1.13979
C	14.5352	0.982257	1.06788
N	14.4373	0.943092	-0.237481
H	14.7545	1.71122	-0.820745
H	14.0439	0.147381	-0.739787
N	14.114	-0.048764	1.80826
C	14.2212	-0.064785	3.15194
O	13.7573	-0.973576	3.83366
C	16.2888	1.71823	7.10405
H	16.969	2.49347	7.46117
C	16.5422	1.38904	5.64078
H	16.8534	2.30869	5.14378
H	17.3162	0.644647	5.46882
O	16.3632	0.587708	7.96776
P	15.3121	6.06336	6.57573
O	15.2134	6.55727	8.00018
O	16.4747	6.64196	5.80431
O	17.4903	-1.50403	7.08086
C	16.6612	-2.59141	7.45492
H	15.6143	-2.27848	7.53393
H	16.9548	-2.97601	8.43593
C	16.7772	-3.71818	6.45868
H	16.359	-4.61194	6.94929
O	16.0593	-3.43668	5.27186
C	16.4926	-4.32768	4.26829
H	15.7647	-5.12534	4.12305
N	16.5531	-3.6109	3.00451
C	16.8911	-2.29894	2.92732
H	17.061	-1.78682	3.86393
C	16.9893	-1.67464	1.74129
H	17.2627	-0.632711	1.67546
C	16.711	-2.43514	0.554264
N	16.7565	-1.85814	-0.621393
H	17.0437	-0.881065	-0.766423
H	16.5931	-2.38588	-1.48269
N	16.406	-3.73769	0.654632
C	16.3521	-4.36985	1.84679
O	16.1478	-5.56976	1.9681
C	18.1817	-4.06817	5.95975
H	18.691	-3.14585	5.65282
C	17.841	-4.9019	4.73442
H	18.5992	-4.86601	3.95407
H	17.7222	-5.94631	5.02847
O	18.9499	-4.7968	6.87429
P	17.7197	-0.280526	8.12461
H	19.3247	-4.18646	7.51252
O	17.8119	-0.802126	9.53869
O	18.9361	0.500514	7.68633
O	14.854	-3.87612	-11.0184
O	12.9624	-7.53565	-9.95901
C	15.2885	-5.14038	-11.4556
C	13.4017	-6.18313	-10.0619
N	15.3853	-5.00996	-7.23269
O	15.6395	-6.09362	-9.28036
C	15.8167	-6.37011	-3.99727
C	16.2692	-4.05572	-3.93229
C	14.8863	-6.21756	-10.4663
C	16.0452	-3.05705	-6.35504
C	16.0689	-4.05797	-5.33807
N	15.5669	-6.43328	-5.29952
C	15.6269	-3.6667	-7.49198
C	14.7991	-5.93165	-8.15505
C	15.6671	-5.2514	-5.9216
N	15.7358	-7.52863	-3.30458
C	13.4578	-5.47594	-8.72204
H	16.379	-5.18082	-11.5702
H	14.8544	-5.39631	-12.4332
H	12.7824	-5.64933	-10.7872
H	15.1048	-7.18189	-10.942
H	15.5021	-3.27868	-8.48853
H	14.6901	-6.88025	-7.62437
H	13.4656	-4.39862	-8.89087
H	12.6284	-5.70938	-8.05883
H	16.0566	-7.58425	-2.35333
H	15.6286	-8.38213	-3.82276
H	16.3314	-2.02278	-6.25558
H	15.3768	-3.19887	-11.4492
O	16.5511	-3.03581	-3.26248
N	16.1164	-5.25778	-3.30214
O	11.1582	-7.73395	-8.16174
O	9.7596	-9.14995	-4.89373
C	11.7869	-8.65981	-7.2826
C	10.3221	-7.90132	-5.27598
N	12.4905	-5.2141	-4.16045
O	12.4131	-6.9739	-5.67895
C	12.9144	-4.53013	-0.721468
C	13.2231	-2.53382	-1.96408
C	11.7082	-8.18409	-5.8604
C	12.8901	-3.04226	-4.5257
C	12.967	-3.30365	-3.12437
N	12.6897	-5.31339	-1.76753
C	12.5857	-4.22652	-5.12403
C	12.1369	-6.59528	-4.36062
C	12.7132	-4.65855	-2.9406
N	12.8876	-5.08496	0.508615
C	10.6486	-6.9122	-4.14821
H	12.8399	-8.80618	-7.53867
H	11.2949	-9.63444	-7.34344
H	9.67152	-7.42622	-6.01318
H	12.1542	-8.97622	-5.24471
H	12.4777	-4.46074	-6.1679
H	12.7474	-7.18914	-3.67251
H	10.0473	-6.00789	-4.229
H	10.4947	-7.31637	-3.15095
H	13.2503	-4.59044	1.30307
H	12.7589	-6.07606	0.636524
H	13.1253	-2.12109	-5.03516
P	11.3989	-7.90688	-9.74639
O	13.4794	-1.30602	-1.9553
N	13.15	-3.20384	-0.776555
O	11.2093	-9.34644	-10.1743
O	10.4942	-6.9368	-10.4754
O	8.66105	-8.9896	-2.609
O	8.5162	-9.78976	1.53216
N	10.3936	-2.17847	0.938172
C	9.63953	-9.74133	-1.91135
C	8.29707	-9.30921	0.210813
N	10.1194	-1.35781	-1.21328
N	9.15858	-5.78876	-0.334889
O	10.0968	-7.90671	-0.425719
C	10.3155	-3.2155	1.78309
C	10.0518	-2.36121	-0.359097
C	9.66895	-9.25718	-0.479555
C	9.13398	-4.23203	-1.9521
C	9.61118	-3.64352	-0.746795
N	9.94537	-4.44107	1.51416
C	8.87088	-5.53244	-1.66226
C	9.16936	-7.09935	0.260682
C	9.60629	-4.63262	0.230784
C	7.84981	-7.85716	0.174191
H	10.6263	-9.63487	-2.37036
H	9.39066	-10.8084	-1.9213
H	7.59602	-9.96841	-0.306808
H	10.5909	-3.00605	2.80965
H	10.3757	-9.88568	0.073587
H	8.50348	-6.3135	-2.30751
H	9.46298	-6.96289	1.30302
H	7.17104	-7.59821	0.982138
H	7.35458	-7.65944	-0.777043
H	10.4953	-0.457869	-0.94308
H	9.99378	-1.50683	-2.21951
H	8.99053	-3.74953	-2.90469
P	8.32887	-9.2633	-4.16798
O	7.78108	-10.658	-4.37686
O	7.37262	-8.17624	-4.60693
O	6.85472	-8.80576	3.17237
C	7.75416	-8.17466	4.07133
H	8.78624	-8.20743	3.7077
H	7.73792	-8.68129	5.04057
C	7.35925	-6.73867	4.28324
H	8.0054	-6.3495	5.08252
O	7.55952	-5.97586	3.11214
C	6.79332	-4.81371	3.30375
H	7.23985	-4.17315	4.06785
N	6.75387	-4.02952	2.09401
C	6.38636	-4.58757	0.910495
H	6.12623	-5.63545	0.935529
C	6.34911	-3.87852	-0.229153
H	6.07841	-4.33204	-1.1694
C	6.73597	-2.50033	-0.160357
N	6.7537	-1.76652	-1.24958
H	6.32044	-2.08405	-2.1335
H	7.0474	-0.800615	-1.20387
N	7.08701	-1.96658	1.01263
C	7.12094	-2.68516	2.15896
O	7.43814	-2.19081	3.2297
C	5.88961	-6.4927	4.71078
H	5.26581	-7.37411	4.55325
C	5.45642	-5.35071	3.78988
H	4.87541	-5.75336	2.9568
H	4.84988	-4.59139	4.27493
O	5.90941	-6.17242	6.0939
P	7.31146	-10.217	2.51735
O	7.88192	-11.1488	3.56249
O	6.1402	-10.7996	1.75814
O	4.6801	-4.10005	6.87298
C	5.72633	-3.45639	7.58371
H	6.70125	-3.74626	7.17873
H	5.706	-3.74119	8.64039
C	5.57873	-1.95563	7.46893
H	6.33531	-1.50714	8.12587
O	5.80329	-1.56751	6.12636
C	4.78381	-0.669525	5.73714
H	5.03412	0.345488	6.03542
N	4.64792	-0.620292	4.30718
C	4.19834	-1.69457	3.60155
H	4.02879	-2.59185	4.1811
C	3.97295	-1.66029	2.27673
C	3.43182	-2.81916	1.50753
H	4.03527	-3.04521	0.630786
H	3.40313	-3.72191	2.12067
H	2.42107	-2.62487	1.1445
C	4.24693	-0.405732	1.59301
O	4.07883	-0.278755	0.367209
N	4.7002	0.633761	2.31953
C	4.93935	0.582347	3.65247
O	5.37661	1.53533	4.26968
C	4.18214	-1.4177	7.8706
H	3.61078	-2.14298	8.45524
C	3.57057	-1.16271	6.50681
H	3.21321	-2.11749	6.11552
H	2.73178	-0.479486	6.51036
O	4.36888	-0.246418	8.66996
P	4.57283	-5.7151	6.88031
O	4.62519	-6.25179	8.29082
O	3.31454	-6.09071	6.12978
O	3.67636	1.81858	7.38518
C	4.45688	3.00084	7.26913
H	5.19104	2.85639	6.48022
H	4.98255	3.21928	8.20299
C	3.56218	4.18245	6.92185
H	4.1632	5.0936	7.00356
O	3.05313	4.09681	5.61124
C	1.68748	3.80398	5.57109
H	1.14912	4.63626	5.11916
N	1.45153	2.66358	4.67863
C	1.40165	1.38175	5.11089
H	1.44813	1.21363	6.1732
C	1.26621	0.345167	4.26775
H	1.17557	-0.66729	4.62856
C	1.21476	0.630013	2.87459
N	1.04264	-0.362858	2.02609
H	0.865656	-1.30626	2.3821
H	0.906935	-0.185434	1.04571
N	1.35689	1.88074	2.44414
C	1.4543	2.92826	3.30528
O	1.55509	4.07545	2.89783
C	2.35429	4.20801	7.86034
H	2.59945	3.60194	8.72565
C	1.23075	3.60778	7.01925
H	1.12104	2.56394	7.29573
H	0.25749	4.06585	7.16872
O	2.0871	5.52732	8.35886
P	3.345	1.0001	8.74926
O	3.63979	1.83004	9.97483
O	1.89373	0.569826	8.63664
O	-0.385951	5.91518	8.83333
O	-4.07141	6.55703	7.50949
C	-0.49369	6.68283	7.61226
C	-2.9416	5.73081	7.66324
N	-2.34792	3.46546	4.82943
O	-1.3948	5.24673	5.9402
C	-1.97269	4.62925	1.52846
C	-1.67515	2.26817	1.56851
C	-1.73007	6.27825	6.8435
C	-1.91763	1.4153	4.05036
C	-1.88318	2.34249	2.96773
N	-2.2086	4.7581	2.82583
C	-2.19389	2.13386	5.17344
C	-2.60712	4.58789	5.65194
C	-2.14549	3.601	3.48888
N	-1.98149	5.73977	0.763958
C	-3.19934	4.36695	7.02726
H	0.384827	6.53244	6.98252
H	-0.541563	7.74491	7.84861
H	-2.71667	5.59211	8.72467
H	-2.05556	7.15682	6.27844
H	-2.27556	1.8037	6.19526
H	-3.27372	5.24937	5.08973
H	-2.64228	3.5977	7.56781
H	-4.2523	4.09794	7.02301
H	-2.0507	5.6405	-0.23246
H	-2.39864	6.59086	1.11644
H	-1.70237	0.359536	4.01032
P	1.03182	5.69005	9.5602
O	-1.46973	1.21013	0.925272
N	-1.69892	3.45968	0.910018
O	1.38317	6.89293	10.4055
O	0.969312	4.40669	10.399
O	-5.32327	8.664	7.75936
O	-8.19273	9.38341	4.79269
N	-5.14027	3.88055	0.452503
C	-5.17404	9.45273	6.57992
C	-7.41996	8.56825	5.65796
N	-4.94916	1.84438	1.52996
N	-5.94392	5.64507	3.97768
O	-5.33622	7.72943	4.87837
C	-5.3275	5.20335	0.530703
C	-5.18286	3.1493	1.58292
C	-5.93283	8.91322	5.38939
C	-5.66538	3.42168	4.15224
C	-5.46386	3.80778	2.79597
N	-5.56803	5.9139	1.61071
C	-5.96305	4.55783	4.83345
C	-6.38043	6.97235	4.28071
C	-5.64799	5.18343	2.72667
C	-7.48044	7.08796	5.32088
H	-4.12076	9.58882	6.32201
H	-5.58019	10.4432	6.80059
H	-7.70179	8.75104	6.69777
H	-5.25249	5.74446	-0.402808
H	-5.90796	9.69282	4.61792
H	-6.21117	4.68391	5.87293
H	-6.68146	7.43402	3.33532
H	-8.45637	6.74158	4.99822
H	-7.19749	6.53278	6.21736
H	-4.81323	1.35543	0.654431
H	-5.06649	1.26893	2.34938
H	-5.63466	2.42933	4.56976
P	-4.05226	7.92795	8.40615
O	-2.76274	8.68397	8.15234
O	-4.23368	7.57913	9.86095
O	-10.1103	9.22955	3.20048
O	-11.5529	9.30161	-0.763297
C	-9.58526	10.0845	2.19624
C	-11.1947	8.94644	0.572164
N	-9.15597	5.96473	1.07276
O	-8.92556	8.26558	0.776828
C	-8.20452	3.30696	-1.07169
C	-8.24413	2.53297	1.17281
C	-9.75237	9.41231	0.847314
C	-8.83455	4.53485	2.77059
C	-8.57379	3.86546	1.53875
N	-8.58201	4.54918	-0.799464
C	-9.18781	5.80546	2.45122
C	-9.66243	7.12335	0.396799
C	-8.76123	4.78429	0.51108
N	-7.85496	3.00753	-2.34807
C	-11.1037	7.45038	0.77211
H	-8.52763	10.3001	2.36732
H	-10.1287	11.0354	2.18675
H	-11.8992	9.40173	1.27007
H	-9.44902	10.136	0.082115
H	-9.48628	6.62247	3.08549
H	-9.5643	6.95311	-0.676162
H	-11.2838	7.21715	1.8206
H	-11.821	6.88826	0.180802
H	-7.86965	2.04204	-2.62843
H	-8.02367	3.65465	-3.11804
H	-8.76244	4.12051	3.76339
P	-9.80689	9.42882	4.77233
O	-8.09408	1.57937	1.96688
N	-8.07749	2.31468	-0.166015
O	-10.3102	10.7632	5.27946
O	-10.4214	8.25629	5.50623
O	-13.0892	7.82241	-2.18262
C	-12.5643	7.87279	-3.49847
H	-11.4962	8.11599	-3.47975
H	-13.0666	8.64388	-4.09077
C	-12.7442	6.53383	-4.18039
H	-12.3776	6.65054	-5.20725
O	-11.9697	5.56178	-3.49954
C	-12.7252	4.39006	-3.27248
H	-12.611	3.69932	-4.10485
N	-12.2316	3.6982	-2.11164
C	-12.381	4.2385	-0.860297
H	-12.7896	5.23961	-0.832216
C	-12.0484	3.58608	0.264595
C	-12.2016	4.17346	1.62763
H	-11.2371	4.40541	2.07639
H	-12.7953	5.08658	1.60699
H	-12.6711	3.47718	2.32443
C	-11.5206	2.23586	0.116165
O	-11.2812	1.5176	1.08952
N	-11.3271	1.77188	-1.14812
C	-11.6164	2.45585	-2.26864
O	-11.3973	2.01971	-3.39559
C	-14.1914	5.98359	-4.23615
H	-14.9296	6.7524	-3.99707
C	-14.1569	4.89549	-3.17561
H	-14.3425	5.37398	-2.2122
H	-14.9112	4.12216	-3.29782
O	-14.4385	5.54544	-5.57409
P	-13.0851	9.16047	-1.2598
O	-13.4529	10.3711	-2.08808
O	-14.0204	8.91229	-0.097258
O	-14.2427	3.0381	-5.81813
C	-13.5177	2.37859	-6.83871
H	-12.4779	2.29587	-6.51532
H	-13.5391	2.94514	-7.7731
C	-14.0813	0.985603	-7.09896
H	-13.6259	0.598606	-8.01723
O	-13.7918	0.109324	-6.02732
C	-14.9675	-0.37088	-5.40095
H	-15.159	-1.40048	-5.69822
N	-14.7723	-0.385172	-3.97322
C	-14.6522	0.792042	-3.30087
H	-14.7233	1.69794	-3.88287
C	-14.4478	0.829534	-1.97975
H	-14.3767	1.76515	-1.44668
C	-14.2587	-0.420622	-1.30783
N	-13.9962	-0.412801	-0.024074
H	-14.089	0.461346	0.491699
H	-13.8667	-1.26406	0.534295
N	-14.3169	-1.56845	-1.98703
C	-14.5745	-1.60886	-3.31601
O	-14.6568	-2.6509	-3.94172
C	-15.6054	1.02083	-7.22646
H	-15.8917	2.03633	-7.47413
C	-16.0825	0.557855	-5.85954
H	-16.1937	1.41582	-5.19913
H	-17.0349	0.034414	-5.8703
O	-16.0508	0.181436	-8.29167
P	-15.2992	4.27039	-6.05422
O	-15.6289	4.40318	-7.51869
O	-16.4923	3.97889	-5.17147
O	-18.309	-0.820268	-7.69047
C	-17.9154	-2.18925	-7.78699
H	-16.8317	-2.28095	-7.90709
H	-18.3765	-2.64161	-8.66986
C	-18.3388	-2.98388	-6.57766
H	-18.1746	-4.03874	-6.85849
O	-17.5863	-2.66601	-5.43395
C	-18.1717	-3.4256	-4.3904
H	-17.7854	-4.4454	-4.4116
N	-17.8017	-2.87743	-3.11191
C	-17.9827	-1.55197	-2.86701
H	-18.331	-0.95237	-3.69707
C	-17.7329	-1.01711	-1.66438
H	-17.8737	0.035211	-1.47231
C	-17.2992	-1.90529	-0.617451
N	-17.1172	-1.42838	0.585053
H	-17.2869	-0.434827	0.810129
H	-16.8684	-2.0309	1.37706
N	-17.0933	-3.20407	-0.876434
C	-17.3156	-3.73444	-2.10379
O	-17.1409	-4.91278	-2.36162
C	-19.7937	-2.86219	-6.10719
H	-20.0708	-1.80083	-6.06963
C	-19.6903	-3.4155	-4.68481
H	-20.2427	-2.81389	-3.96184
H	-20.0922	-4.42822	-4.64034
O	-20.6988	-3.59863	-6.88385
P	-17.6131	0.240234	-8.68717
H	-20.9065	-3.09609	-7.67394
O	-17.7659	-0.161868	-10.1297
O	-18.1963	1.62695	-8.38857
A	g 16.109864000	-5.00815	-1.14218
A	g 13.309128000	-1.79177	0.81598
A	g 10.799873000	-0.099546	1.70366
A	g 7.578371000	0.118967	1.31337
A	g 4.959302000	2.52311	1.30137
A	g 1.602326000	2.5039	0.394899
A	g -1.386062000	3.10838	-1.12226
A	g -4.916253000	2.87043	-1.58541
A	g -7.673233000	0.250712	-0.45184
A	g -10.871502000	-0.285714	-1.19242
A	g -13.953421000	-3.47392	-0.965989
A	g -16.435891000	-4.6578	0.766967
N	a 9.692885000	-8.64947	-11.5858
N	a 5.988242000	-9.73222	-5.24028
N	a 6.479750000	-12.6787	2.8763
N	a 2.585996000	-7.02293	7.98624
N	a 1.319516000	2.16571	10.1518
N	a 2.222835000	5.56305	11.9495
N	a -1.937499000	7.89889	10.0813
N	a -11.599620000	9.66613	6.68939
N	a -15.162680000	10.6839	-0.742674
N	a -17.708070000	3.40006	-7.01524
N	a -18.550736000	1.76405	-10.6974
N	a -9.409389000	-7.34086	11.5851
N	a -5.813539000	-10.5442	4.12384
N	a -6.620260000	-12.2948	-3.76783
N	a -2.710581000	-6.9184	-7.52901
N	a -0.627947000	2.12478	-10.6092
N	a -0.492182000	5.45813	-12.9521
N	a 4.229827000	10.2364	-9.91545
N	a 12.163776000	9.96777	-1.47295
N	a 13.179099000	12.5789	1.32062
N	a 16.934216000	7.85633	7.59446
N	a 19.784136000	0.179196	9.69954
O	-14.2577	-10.189	4.16646
H	-15.0782	-10.5992	3.88808
H	-14.4975	-9.60737	4.9227
O	-14.8687	-9.08205	-0.261703
H	-14.2615	-8.78032	-0.93992
H	-14.3053	-9.13291	0.541183
O	-9.51971	-1.75345	4.23543
H	-8.62967	-1.49108	4.59204
H	-9.89862	-2.45704	4.76933
O	-7.26123	-0.724487	5.08373
H	-6.41915	-0.724796	4.61125
H	-7.61267	0.197309	5.01285
O	-4.64037	-0.372552	3.61661
H	-4.07624	-0.692157	2.88221
H	-4.05798	0.196286	4.13172
O	-0.876739	-2.48751	-3.48525
H	-1.4846	-3.20952	-3.31683
H	-0.277053	-2.45714	-2.71834
O	0.333199	-2.90874	3.05715
H	-0.28589	-3.05939	2.30176
H	1.00507	-3.5883	2.98411
O	6.15362	0.377516	-4.49892
H	6.22492	0.35153	-5.45438
H	7.00766	0.749439	-4.17976
O	5.27649	-2.17181	-3.51607
H	5.5752	-1.35319	-3.94465
H	4.44925	-1.92584	-3.06584
O	10.1318	-1.43467	-4.01856
H	10.8376	-2.05158	-4.24712
H	10.5575	-0.560687	-3.96747
O	15.3674	2.30127	-2.5175
H	14.8322	1.66237	-3.06419
H	15.5027	3.08038	-3.05807
O	17.6089	0.590471	-1.69265
H	17.5915	0.177801	-2.58181
H	16.9537	1.29152	-1.79579
O	13.1425	-10.0706	-3.14625
H	13.7069	-9.84578	-3.89084
H	13.2637	-9.37011	-2.49065
O	12.4449	-7.82837	1.84027
H	11.933	-7.28109	2.47383
H	13.2703	-8.02908	2.28337
O	8.93894	5.64918	4.51101
H	8.9576	5.38324	3.57993
H	8.01694	5.48313	4.75751
O	3.45158	8.35435	-2.29974
H	2.63013	8.18673	-2.80471
H	4.17156	8.19651	-2.91991
O	-3.7509	8.19391	1.40544
H	-4.41796	7.49227	1.48515
H	-3.30285	8.19127	2.27287
O	-7.9999	4.66689	-4.79949
H	-7.07829	4.88146	-4.97561
H	-8.36058	5.42034	-4.2978
O	-17.4594	1.13968	1.56561
H	-16.5776	1.53283	1.4867
H	-17.4428	0.786179	2.47811
O	-14.6736	1.69856	1.68734
H	-14.1864	2.51613	1.79956
H	-14.3712	1.08054	2.40192
O	15.7602	-7.46372	-0.271736
H	15.8135	-7.1185	0.625975
H	14.8257	-7.69109	-0.447817
O	13.1763	-3.78349	3.86939
H	13.2026	-2.82971	3.7106
H	13.7728	-3.89281	4.61385
O	11.408	0.224214	5.53241
H	11.5702	1.04498	5.04182
H	12.1283	-0.345666	5.24601
O	9.47474	-0.315676	3.75266
H	8.81553	-1.01602	3.85437
H	10.0399	-0.248483	4.55298
O	6.2243	4.48816	4.75752
H	6.52905	3.59976	4.54165
H	5.48837	4.60373	4.13408
O	4.33434	4.71456	2.59439
H	3.40677	4.64662	2.85962
H	4.53307	5.67657	2.49671
O	-2.6248	7.56497	3.84827
H	-3.48836	7.52475	4.28001
H	-2.39494	6.64916	3.61487
O	-4.00646	5.07895	-2.4661
H	-4.48498	5.13455	-3.31751
H	-3.07896	5.07315	-2.72936
O	-6.23822	9.60593	1.82226
H	-6.76972	8.93495	1.38598
H	-5.32351	9.36233	1.61847
O	-4.99327	4.68486	-4.96795
H	-4.13842	4.79785	-5.40111
H	-5.06161	3.72283	-4.81643
O	-9.19916	6.32267	-2.97792
H	-8.88639	5.78512	-2.2234
H	-10.1004	6.00963	-3.12273
O	-9.87676	-2.56752	-5.02883
H	-10.4882	-1.85154	-4.75896
H	-9.02111	-2.24474	-4.73349
O	-11.5479	-0.580042	-4.23359
H	-12.2169	-0.471891	-4.91878
H	-11.3326	0.333791	-3.96493
O	-10.9075	-5.2082	-4.13895
H	-10.6249	-4.36283	-4.52563
H	-10.5169	-5.22045	-3.25117
O	-13.4604	-5.20019	-2.98165
H	-12.6088	-5.19238	-3.46014
H	-14.051	-4.64382	-3.50197
O	-16.5925	-6.92487	-0.254362
H	-15.9775	-7.68871	-0.274137
H	-16.7017	-6.6211	-1.16193
O	-16.8465	-0.111873	3.99404
H	-16.9039	-1.0569	3.7526
H	-15.8943	0.039632	4.03329
O	-13.8627	-0.129073	3.46527
H	-13.7794	-0.99985	3.03141
H	-12.9663	0.115929	3.76581
O	-11.204	0.657876	3.94612
H	-11.0632	1.01995	3.05848
H	-10.6819	-0.158292	4.00471
O	-8.41321	1.65553	4.65702
H	-8.25751	1.73384	3.68874
H	-9.36896	1.53737	4.72616
O	-2.99115	-0.963367	1.40832
H	-3.59276	-0.843103	0.648678
H	-2.39469	-0.178483	1.34485
O	-1.19766	-2.9944	0.864636
H	-1.8813	-2.31835	1.05536
H	-0.611718	-2.60026	0.202372
O	0.554691	-1.75836	-1.16456
H	1.51931	-1.82365	-1.36123
H	0.379138	-0.823891	-1.33879
O	3.10537	-1.30487	-1.89753
H	2.72169	-0.45464	-2.19075
H	3.52025	-1.07445	-1.03693
O	8.28722	1.79814	-3.60465
H	7.93874	2.66702	-3.83167
H	8.22061	1.7492	-2.60252
O	11.111	1.23157	-3.56021
H	10.2176	1.56507	-3.74232
H	11.2418	1.38054	-2.60436
O	13.9191	0.526975	-3.84177
H	13.0308	0.870294	-4.02108
H	13.7658	-0.229659	-3.22638
O	17.0107	-0.530562	-4.16019
H	16.1158	-0.210163	-4.30722
H	16.8904	-1.47895	-3.93284
O	14.8699	-9.08646	-5.83236
H	15.6413	-9.42768	-6.28795
H	15.0059	-8.11352	-5.79573
O	13.1688	-8.01897	-1.07948
H	12.5631	-8.17589	-0.34416
H	12.9191	-7.13528	-1.42953
O	11.1252	-6.08261	3.50164
H	11.7728	-5.40031	3.72078
H	10.5334	-5.63034	2.87068
O	5.11027	7.26795	2.4088
H	6.05351	7.27923	2.5903
H	5.01014	7.7096	1.53608
O	5.08065	8.29194	-0.084191
H	5.60903	7.59799	-0.51212
H	4.32439	8.41213	-0.684044
O	1.40213	7.45603	-3.83019
H	1.70699	6.53042	-3.74625
H	0.486936	7.43687	-3.54231
O	-13.1044	-9.15118	1.85669
H	-12.8003	-8.23636	2.0026
H	-13.4159	-9.49579	2.71487
O	-14.9514	-8.47349	6.10818
H	-14.9193	-7.58647	5.67221
H	-15.7481	-8.4522	6.64134
